# Supplementary material for: Beyond political will: unpacking the drivers of (non) health reforms in sub-Saharan Africa
Source: PubMed Central journal article supplement — BMJ Glob Health. 2022 Dec 1;7(12):e010228. doi: 10.1136/bmjgh-2022-010228 (PMC9717331; doi:10.1136/bmjgh-2022-010228), 2022-12-01
Supplement: bmjgh-2022-010228supp001.pdf [file bmjgh-2022-010228supp001.pdf]

| Publication title                                                                                      | Country of the study    | Article type      | First Author      | Year of publication | Issue                      | Policy stage                          | Theory used for analysis               | Single/combined theory | First author country location | First Author Regional Location | Publication Journal         |
|--------------------------------------------------------------------------------------------------------|-------------------------|-------------------|-------------------|---------------------|----------------------------|---------------------------------------|----------------------------------------|------------------------|-------------------------------|--------------------------------|-----------------------------|
| The Politics of Priority Setting for Reproductive Health: Breast and Cervical Cancer in Ghana          | Ghana                   | Review            | Laura Reichenbach | 2002                | Breast and cervical cancer | Agenda setting and formulation        | Social construction and agenda setting | Combined               | USA                           | USA                            | Reproductive Health Matters |
| The SAZA study: implementing health financing reform in                                                | South Africa and Zambia | Original research | Lucy Gilson       | 2003                | Financing-General          | Implementation-national level         | Walt and Gilson                        | Single                 | South Africa                  | Africa                         | Health Policy and Planning  |
| Federal Homogeneity from the Bottom Up: Provincial Shaping of National HIV/AIDS Policy in South Africa | South Africa            | Review            | Nicole Steyteler  | 2003                | HIV/AIDS                   | Implementation-national level         | Bottom-up theory                       | Single                 | South Africa                  | Africa                         | The Journal of Federalism   |
| The politics of AIDS in South Africa: beyond the controversies                                         | South Africa            | Review            | Didier Fassin     | 2003                | HIV/AIDS                   | Agenda setting and formulation        | PEA                                    | Single                 | France                        | Europe                         | BMJ                         |
| 'We are bitter but we are satisfied': nurses as street-level bureaucrats in South Africa               | South Africa            | Original research | Walker            | 2004                | Financing-User fees        | Implementation-service delivery level | Street level bureaucracy               | single                 | South Africa                  | Africa                         | Social Science & Medicine   |

|                                                                                                                                                                                     |              |                   |                                     |      |                 |                                       |                            |          |              |        |                                    |
|-------------------------------------------------------------------------------------------------------------------------------------------------------------------------------------|--------------|-------------------|-------------------------------------|------|-----------------|---------------------------------------|----------------------------|----------|--------------|--------|------------------------------------|
| It makes me want to run away to Saudi Arabia': management and implementation challenges for public financing reforms from a maternity ward perspective                              | South Africa | Original research | LOVEDAY PENN-KEKANA                 | 2004 | Maternal Health | Implementation-service delivery level | Street level bureaucracy   | Single   | South Africa | Africa | Health Policy and Planning         |
| Public social policy development and implementation: a case study of the Ghana National Health Insurance scheme                                                                     | Ghana        | Review            | <a href="#">Irene Akua Agvepong</a> | 2008 | Financing-NHI   | Agenda setting and formulation        | Walt and Gilson and others | Combined | Ghana        | Africa | Health Policy and Planning         |
| Translating research into maternal health care policy: a qualitative case study of the use of evidence in policies for the treatment of eclampsia and pre-eclampsia in South Africa | South Africa | Original research | Karen Daniels                       | 2008 | Maternal health | Agenda setting and formulation        | Kingdon, 3Is               | Combined | South Africa | Africa | Health Research Policy and Systems |

|                                                                                                            |                                                           |                   |                  |      |                         |                                |                                           |        |                |        |                                       |
|------------------------------------------------------------------------------------------------------------|-----------------------------------------------------------|-------------------|------------------|------|-------------------------|--------------------------------|-------------------------------------------|--------|----------------|--------|---------------------------------------|
| Understanding the politics of national HIV policies: the roles of institutions, interests and ideas        | Uganda, Botswana, South Africa                            | Review            | Dickson          | 2008 | HIV/AIDS                | Agenda setting and formulation | 3Is                                       | Single | South Africa   | Africa | HLSP Institute                        |
| Power, politics and rehabilitation in sub-Saharan Africa: from the personal to the political               | Multiple countries                                        | Review            | Catherine Campel | 2011 | Rehabilitation services | Implementation-National level  | Power                                     | Single | United Kingdom | Europe | Disability and Rehabilitation         |
| Democratic demands and social policies: the politics of health reform in Ghana                             | Ghana                                                     | Review            | Giovanni Carbone | 2011 | Health reforms          | Agenda setting and formulation | Democratization and electoral competition | Single | Italy          | Europe | The Journal of Modern African Studies |
| Removing user fees in the health sector: a review of policy processes in six sub-Saharan African countries | Burkina Faso, Burundi, Ghana, Liberia, Senegal and Uganda | Review            | Bruno Meessen    | 2011 | Financing-User fees     | Implementation-national level  | Good practice hypotheses framework.       | Single | Belgium        | Europe | Health Policy and Planning            |
| Using stakeholder analysis to support moves towards universal                                              | South Africa & Tanzania                                   | Original research | Lucy Gilson      | 2012 | UHC                     | Agenda setting and formulation | Stakeholder analysis                      | Single | South Africa   | Africa | Health Policy and Planning            |

|                                                                                                                                     |              |                   |                                 |      |                   |                                       |                                                                                        |          |                |        |                              |
|-------------------------------------------------------------------------------------------------------------------------------------|--------------|-------------------|---------------------------------|------|-------------------|---------------------------------------|----------------------------------------------------------------------------------------|----------|----------------|--------|------------------------------|
| coverage: lessons from the SHIELD project                                                                                           |              |                   |                                 |      |                   |                                       |                                                                                        |          |                |        |                              |
| Policy initiation and political levers in health policy: lessons from Ghana's health insurance                                      | Ghana        | Original research | Anthony Seddoh                  | 2012 | Financing-NHI     | Agenda setting and formulation        | agenda setting, symbols manipulation, constituency preservation and coalition building | Combined | Ghana          | Africa | BMC Public Health            |
| Actor interfaces and practices of power in a community health worker programme: a South African study of unintended policy outcomes | South Africa | Original research | Uta Lehmann1* and Lucy Gilson2, | 2012 | CHWs              | Implementation-service delivery level | Power                                                                                  | Combined | South Africa   | Africa | Health Policy and Planning   |
| Players and processes behind the national health insurance scheme: a case study of Uganda                                           | Uganda       | Original research | Robert K Basaza                 | 2013 | Financing-NHI     | Agenda setting and formulation        | Players and process                                                                    | Single   | Uganda         | Africa | BMC Health Services Research |
| South African health financing reform 2000–2010: Understanding the agenda-                                                          | South Africa | Original research | Timesh D Pillay                 | 2013 | Financing-General | Agenda setting and formulation        | Kingdon and Hall                                                                       | Combined | United Kingdom | Europe | Health Policy                |

|                                                                                                                                                   |              |                   |                   |      |                     |                                       |                                                      |        |                |               |                                    |
|---------------------------------------------------------------------------------------------------------------------------------------------------|--------------|-------------------|-------------------|------|---------------------|---------------------------------------|------------------------------------------------------|--------|----------------|---------------|------------------------------------|
| setting process                                                                                                                                   |              |                   |                   |      |                     |                                       |                                                      |        |                |               |                                    |
| Developing the national community health assistant strategy in Zambia: a policy analysis                                                          | Zambia       | Original research | Joseph Mumba Zulu | 2013 | CHWs                | Agenda setting and formulation        | Walt and Gilson                                      | Single | Zambia, Sweden | Africa/Europe | Health Research Policy and Systems |
| Universal financial protection through National Health Insurance: a stakeholder analysis of the proposed one-time premium payment policy in Ghana | Ghana        | Original research | Abihiro           | 2013 | Financing-NHI       | Agenda setting and formulation        | Stakeholder analysis (position, interests and power) | Single | Ghana          | Africa        | Health Policy and Planning         |
| Global health actors no longer in favor of user fees: a documentary study                                                                         | SSA          | Review            | Emilie Robert     | 2013 | Financing-User fees | Agenda setting and formulation        | Stakeholder analysis                                 | single | Canada         | North America | Globalization and Health           |
| DISCRETION AMONG STREET LEVEL BUREAUCRATS: A CASE STUDY OF NURSES IN A PUBLIC                                                                     | South Africa | Review            | Timalige Zigabo   | 2014 | Service delivery    | Implementation-service delivery level | Street level bureaucracy                             | Single | South Africa   | Africa        | Dissertation                       |

|                                                                                                                                                                                                            |                   |                   |                    |      |                   |                                                |                              |          |                 |        |                                    |
|------------------------------------------------------------------------------------------------------------------------------------------------------------------------------------------------------------|-------------------|-------------------|--------------------|------|-------------------|------------------------------------------------|------------------------------|----------|-----------------|--------|------------------------------------|
| HOSPITAL IN CAPE TOWN                                                                                                                                                                                      |                   |                   |                    |      |                   |                                                |                              |          |                 |        |                                    |
| Climate for evidence informed health system policymaking in Cameroon and Uganda before and after the introduction of knowledge translation platforms: a structured review of governmental policy documents | Cameroon & Uganda | Review            | Pierre Ongolo-Zogo | 2014 | Evidence          | Agenda setting, formulation and implementation | 31s+ External                | Combined | Ghana, Cameroon | Africa | Health Research Policy and Systems |
| THE POLITICS OF HEALTH CARE REFORM: A COMPARATIVE ANALYSIS OF SOUTH AFRICA, SWEDEN AND CANADA                                                                                                              | South Africa      | Review            | Kimberly Usher     | 2015 | Financing-General | Agenda setting and formulation                 | Power Resources Theory (PRT) | Single   | South Africa    | Africa | dissertation                       |
| Development of oral health policy in Nigeria: an analysis of the role of context, actors and policy process                                                                                                | Nigeria           | Original research | Enyi Etiaba        | 2015 | Oral health       | Agenda setting and formulation                 | Walt and Gilson              | Single   | Nigeria         | Africa | BMC Oral Health                    |

|                                                                                                                                                                  |              |                   |                             |      |                     |                                       |                                        |          |                |               |                                    |
|------------------------------------------------------------------------------------------------------------------------------------------------------------------|--------------|-------------------|-----------------------------|------|---------------------|---------------------------------------|----------------------------------------|----------|----------------|---------------|------------------------------------|
| The impact of stakeholder values and power relations on community-based health insurance coverage: qualitative evidence from three Senegalese case studies       | Senegal      | Original research | Philipa Mladovsky           | 2015 | Financing-CBHI      | Agenda setting and formulation        | Values and power                       | Combined | United Kingdom | Africa/Europe | Health Policy and Planning         |
| Assessing political priority for reproductive health in Ethiopia                                                                                                 | Ethiopia     | Original research | Ndola Prata, a Anna Summerb | 2015 | Reproductive health | Agenda setting and formulation        | Shiffman & Smith                       | Single   | USA            | USA           | Reproductive Health Matters        |
| Doctors as street-level bureaucrats in a rural hospital in South Africa                                                                                          | South Africa | Original research | BM Gaede                    | 2015 | Service delivery    | Implementation-service delivery level | Street level bureaucracy               | single   | South Africa   | Africa        | Rural Health                       |
| The role of policy actors and contextual factors in policy agenda setting and formulation: maternal fee exemption policies in Ghana over four and a half decades | Ghana        | Original research | Augustina Koduah            | 2015 | Maternal Health     | Agenda setting and formulation        | Kingdon, Mintzberg, Thomas and Grindle | Combined | Ghana          | Africa        | Health Research Policy and Systems |

|                                                                                                                                                                               |        |                   |                     |      |               |                                |                                                                             |          |              |               |                                              |
|-------------------------------------------------------------------------------------------------------------------------------------------------------------------------------|--------|-------------------|---------------------|------|---------------|--------------------------------|-----------------------------------------------------------------------------|----------|--------------|---------------|----------------------------------------------|
| Doubt, defiance, and identity: Understanding resistance to male circumcision for HIV prevention in Malawi                                                                     | Malawi | Original research | Justin O. Parkhurst | 2015 | VMMC          | Agenda setting and formulation | social, economic, and political contexts                                    | Combined | UK           | Europe        | Social Science & Medicine                    |
| Power and pro-poor policies: the case of iCCM in Niger                                                                                                                        | Niger  | Original research | Sarah L Dalglish    | 2015 | Child health  | Agenda setting and formulation | Power                                                                       | single   | USA          | USA           | Health Policy and Planning                   |
| Technical analysis, contestation and politics in policy agenda setting and implementation: the rise and fall of primary care maternal services from Ghana's capitation policy | Ghana  | Original research | Augustina Koduah    | 2016 | Financing-NHI | Agenda setting and formulation | Mintzberg, Grindle and Thomas Stermán's concept of policy resistance (2006) | Combined | Ghana        | Africa/Europe | BMC Health Services Research                 |
| The Politico-Economic Challenges of Ghana's National Health Insurance Scheme Implementation                                                                                   | Ghana  | Original research | Adam Fusheini       | 2016 | Financing-NHI | Agenda setting and formulation | Political economy                                                           | Single   | South Africa | Africa        | International Journal of health Policy & Mgt |



|                                                                                                                               |              |                   |                    |      |                         |                                       |                                                           |          |                |        |                                  |
|-------------------------------------------------------------------------------------------------------------------------------|--------------|-------------------|--------------------|------|-------------------------|---------------------------------------|-----------------------------------------------------------|----------|----------------|--------|----------------------------------|
| Political economy of decentralising HIV and AIDS treatment services to primary healthcare facilities in three Nigerian states | Nigeria      | Original research | Chinyere Mbachu    | 2016 | HIV/AIDS                | Implementation-service delivery level | Political economy- Eaton et al. (2011) and Ribot's (2002) | Combined | Nigeria        | Africa | African Journal of AIDS Response |
| Why do policies change? Institutions, interests, ideas and networks in three cases of policy reform                           | Burkina Faso | Original research | Jessica C Shearer  | 2016 | HIV/AIDS, Malaria, IMCI | Agenda setting and formulation        | 3Is +Networks                                             | Combined | USA            | USA    | Health Policy and Planning       |
| Health Security and The International Politics of Zimbabwe's Cholera Outbreak, 2008-09                                        | Zimbabwe     | Review            | Simukai Chigudu    | 2016 | Cholera                 | Agenda setting and formulation        | Copenhagen School's securitization framework              | Single   | United Kingdom | Europe | Global Health Governance         |
| Power and Agenda-Setting in Tanzanian Health Policy: An Analysis of Stakeholder Perspectives                                  | Tanzania     | Original research | Sara Elisa Fischer | 2016 | Donor aid               | Agenda setting and formulation        | Kingdon                                                   | Single   | Tanzania       | Africa | Health Policy and Management     |
| Stakeholders Perspectives on the Success                                                                                      | Ghana        | Original research | Adam Fusheini      | 2017 | Financing-NHI           | Agenda setting and formulation        | Stakeholder analysis                                      | Single   | South Africa   | Africa | International Journal of Health  |

|                                                                                                                                                      |              |                   |                    |      |               |                                |                         |        |                |               |                                    |
|------------------------------------------------------------------------------------------------------------------------------------------------------|--------------|-------------------|--------------------|------|---------------|--------------------------------|-------------------------|--------|----------------|---------------|------------------------------------|
| Drivers in Ghana's National Health Insurance Scheme – Identifying Policy Translation Issues                                                          |              |                   |                    |      |               |                                |                         |        |                |               | Policy & Mgt                       |
| Setting performance-based financing in the health sector agenda: a case study in Cameroon                                                            | Cameroon     | Review            | Isidore Sieleunou  | 2017 | Financing-PBF | Agenda setting and formulation | Kingdon                 | Single | Canada         | North America | Globalization and Health           |
| Towards understanding the drivers of policy change: a case study of infection control policies for multi-drug resistant tuberculosis in South Africa | South Africa | Original research | Trust Saidi        | 2017 | MDR-TB        | Agenda setting and formulation | Kingdon                 | Single | South Africa   | Africa        | Health Research Policy and Systems |
| Life in the buffer zone: Social relations and surplus health workers in Uganda's medicines retail sector                                             | Uganda       | Original research | Eleanor Hutchinson | 2017 | Drug stores   | Agenda setting and formulation | ethnographic research f | single | United Kingdom | Europe        | Social Science & Medicine          |

|                                                                                                                                                       |              |                   |                     |      |                  |                                                |                                                            |          |                |        |                              |
|-------------------------------------------------------------------------------------------------------------------------------------------------------|--------------|-------------------|---------------------|------|------------------|------------------------------------------------|------------------------------------------------------------|----------|----------------|--------|------------------------------|
| "Sometimes it is difficult for us to stand up and change this": an analysis of power within priority-setting for health following devolution in Kenya | Kenya        | Original research | Rosalind McCollum   | 2018 | Priority setting | Agenda setting and formulation                 | Gaventa's power cube and Veneklasen's expressions of power | Combined | United Kingdom | Europe | BMC Health Services Research |
| The bumpy trajectory of performance based financing for healthcare in Sierra Leone: agency, structure and frames shaping the policy process           | Sierra Leone | Original research | Maria Paola Bertone | 2018 | Financing-PBF    | Agenda setting and formulation                 | political economy framework (actors and structure, frames) | Single   | United Kingdom | Europe | Globalization and Health     |
| Political Priority for Abortion Law Reform in Malawi: Transnational and National Influences                                                           | Malawi       | Original research | Judith Dair         | 2018 | Abortion         | Agenda setting and formulation                 | Shiffman & Smith                                           | Single   | Malawi         | Africa | Health and Human Rights      |
| UNICEF's contribution to the adoption and implementation of option B+ for preventing mother-to-                                                       | SSA          | Review            | M. F. Chersich      | 2018 | PMTCT            | Agenda setting, formulation and implementation | Walt and Gilson, Kingdon                                   | Single   | South Africa   | Africa | Globalization and Health     |

|                                                                                                                        |        |                   |                     |      |                 |                                       |                                           |          |                           |        |                                    |
|------------------------------------------------------------------------------------------------------------------------|--------|-------------------|---------------------|------|-----------------|---------------------------------------|-------------------------------------------|----------|---------------------------|--------|------------------------------------|
| child transmission of HIV: a policy analysis                                                                           |        |                   |                     |      |                 |                                       |                                           |          |                           |        |                                    |
| Influence of the WHO framework convention on tobacco control on tobacco legislation and policies in sub-Saharan Africa | SSA    | Original research | Jennifer P. Wisdom1 | 2018 | Tobacco Control | Agenda setting and formulation        | Walt & Gilson                             | Single   | USA                       | USA    | BMC Public Health                  |
| Introduction of male circumcision for HIV prevention in Uganda: analysis of the policy process                         | Uganda | Original research | Walter Denis Odoch1 | 2018 | VMMC            | Agenda setting and formulation        | Walt and Gilson, Kingdon                  | Combined | Tanzania                  | Africa | Health Research Policy and Systems |
| Ghana's community-based primary health care: Why women and children are 'disadvantaged' by its implementation          | Ghana  | Original research | Roger Atinga        | 2018 | CHWs            | Implementation-service delivery level | Street level bureaucracy                  | Single   | Ghana                     | Africa | Social Science & Medicine          |
| The Politics of State Welfare Expansion in Africa: Emergence of                                                        | Ghana  | Original research | Hassan Wahab        | 2019 | Financing-NHI   | Agenda setting and formulation        | Democratization and electoral competition | Single   | Ghana-University of Ghana | Africa | Africa Today                       |

|                                                                                                                  |          |                   |                 |      |                        |                                |                                                                                                |          |                |               |                                                   |
|------------------------------------------------------------------------------------------------------------------|----------|-------------------|-----------------|------|------------------------|--------------------------------|------------------------------------------------------------------------------------------------|----------|----------------|---------------|---------------------------------------------------|
| National Health Insurance in Ghana, 1993–2004                                                                    |          |                   |                 |      |                        |                                |                                                                                                |          |                |               |                                                   |
| It's politics, stupid! A political analysis of the HIV/AIDS Trust Fund in Uganda                                 | Uganda   | Original research | Charles Birungi | 2019 | Financing-HIV AIDS tax | Agenda setting and formulation | Kingdon and advocacy coalition frameworks                                                      | Combined | United Kingdom | Africa/Europe | African Journal of AIDS Response                  |
| Towards Universal Health Coverage in Ethiopia's 'developmental state'? The political drivers of health insurance | Ethiopia | Original research | Tom Lavers      | 2019 | Financing-NHI          | Agenda setting and formulation | Political settlements                                                                          | Single   | United Kingdom | Europe        | Social Science Medicine                           |
| The political economy of results-based financing: the experience of the health system in Zimbabwe                | Zimbabwe | Original research | Witter          | 2019 | Financing-PBF          | Agenda setting and formulation | political economy framework (Content, Actors, Distribution of resources, Institutionalization) | Combined | United Kingdom | Europe        | <a href="#">Global Health Research and Policy</a> |
| Kenya's Health in All Policies strategy: a policy analysis using Kingdon's multiple streams                      | Kenya    | Original research | Joy Mauti       | 2019 | Intersectoral approach | Agenda setting and formulation | Kingdon                                                                                        | Single   | Germany        | Europe        | Health Research Policy and Systems                |

|                                                                                                                         |              |                   |                                      |      |                     |                                |                                                                 |          |          |               |                                              |
|-------------------------------------------------------------------------------------------------------------------------|--------------|-------------------|--------------------------------------|------|---------------------|--------------------------------|-----------------------------------------------------------------|----------|----------|---------------|----------------------------------------------|
| 'An uneasy compromise': strategies and dilemmas in realizing a permissive abortion law in Ethiopia                      | Ethiopia     | Original research | Getnet Tadele and Karen Marie Moland | 2019 | Abortion            | Agenda setting and formulation | Walt and Gilson                                                 | Single   | Ethiopia | Africa        | International Journal for Equity in Health   |
| Health, life and rights: a discourse analysis of a hybrid abortion regime in Tanzania                                   | Tanzania     | Original research | Richard Sambaiga                     | 2019 | Abortion            | Agenda setting and formulation | Fairclough's concepts interdiscursivity and recontextualization | Combined | Tanzania | Africa        | International Journal for Equity in Health   |
| 'Never let a crisis go to waste': post-Ebola agenda setting for health system strengthening in Guinea                   | Guinea       | Original research | Delphin Kolie                        | 2019 | Ebola               | Agenda setting and formulation | Kingdon                                                         | Single   | Guinea   | Africa        | BMJ Global Health                            |
| The origins of Ethiopia's primary health care expansion: The politics of state building and health system strengthening | Ethiopia     | Review            | Kevin Croke                          | 2020 | Primary Health Care | Agenda setting and formulation | Developmental state                                             | Single   | USA      | USA           | Health Policy and Planning                   |
| Scaling-Up Performance-Based Financing in Burkina Faso: From PBF to User Fees Exemption                                 | Burkina Faso | Original research | Mathieu Seppey                       | 2020 | Financing-PBF       | Agenda setting and formulation | Walt and Gilson                                                 | Single   | Canada   | North America | International Journal of Health Policy & Mgt |

|                                                                                                                                                        |              |                   |                                |      |                           |                                       |                                                               |          |              |               |                                              |
|--------------------------------------------------------------------------------------------------------------------------------------------------------|--------------|-------------------|--------------------------------|------|---------------------------|---------------------------------------|---------------------------------------------------------------|----------|--------------|---------------|----------------------------------------------|
| Strategic Purchasing                                                                                                                                   |              |                   |                                |      |                           |                                       |                                                               |          |              |               |                                              |
| Policy Adoption and the Implementation Woes of the Intersectoral First 1000 Days of Childhood Initiative, In the Western Cape Province of South Africa | South Africa | Original research | Ida Okeyo                      | 2020 | Intersectoral approach    | Agenda setting and formulation        | 3Is                                                           | Single   | South Africa | Africa        | International Journal of Health Policy & Mgt |
| What makes advocacy work? Stakeholders' voices and insights from prioritisation of maternal and child health programme in Nigeria                      | Nigeria      | Original research | Benjamin Uzochukwu             | 2020 | Maternal and child health | Agenda setting and formulation        | Kingdon, power politics, media influence communication theory | Combined | Nigeria      | Africa        | BMC Health Services Research                 |
| Power, policy and abortion care in Uganda                                                                                                              | Uganda       | Original research | Alexander Kagaha               | 2020 | Abortion                  | Agenda setting and formulation        | Ethnographic and critical discourse analysis                  | single   | South Africa | Africa        | Health Policy and Planning                   |
| Ideas and Policy Implementation: Understanding the Resistance                                                                                          | SSA          | Review            | Daniel Béland and Valéry Ridde | 2020 | Financing-User fees       | Implementation-service delivery level | Ideas                                                         | Single   | Canada       | North America | Global Health Governance                     |

|                                                                                                                                                                          |              |                   |                        |      |               |                                |                                  |        |         |        |                                                          |
|--------------------------------------------------------------------------------------------------------------------------------------------------------------------------|--------------|-------------------|------------------------|------|---------------|--------------------------------|----------------------------------|--------|---------|--------|----------------------------------------------------------|
| against Free Health Care in Africa                                                                                                                                       |              |                   |                        |      |               |                                |                                  |        |         |        |                                                          |
| Emergence of universal antiretroviral therapy coverage in South Africa: applying the advocacy coalition framework to refine the narratives and inform epidemic responses | South Africa | Review            | Benjamin Momo Kadia    | 2020 | HIV/AIDS      | Agenda setting and formulation | Advocacy coalition framework     | Single | Cameron | Africa | PAMJ                                                     |
| On the Politics of Lockdown and Lockdown Politics in Africa: COVID-19 and Partisan Expedition in Ghana                                                                   | Ghana        | Original research | Awaisu Imurana Braimah | 2020 | COVID-19      | Agenda setting and formulation | Political expedition             | Single | Ghana   | Africa | Journal of Political Science and International Relations |
| Who Is Democracy Good For? Elections, Rural Bias, and Health and Education Outcomes in Sub-Saharan Africa                                                                | SSA          | Original research | Robin Harding          | 2020 | Health equity | Agenda setting and formulation | Democratic electoral competition | Single | UK      | Europe | The Journal of Politics                                  |



|                                                                                                                                                                         |                                                                                      |                   |                              |      |                 |                                |                                                            |          |                |               |                                  |
|-------------------------------------------------------------------------------------------------------------------------------------------------------------------------|--------------------------------------------------------------------------------------|-------------------|------------------------------|------|-----------------|--------------------------------|------------------------------------------------------------|----------|----------------|---------------|----------------------------------|
| Performance-Based Financing (PBF) in Mali: is it legitimate to speak of the emergence of a public health policy?                                                        | Mali                                                                                 | Original research | Abdourahmane Coulibaly       | 2020 | Financing-PBF   | Agenda setting and formulation | Kingdon                                                    | Single   | Mali/France    | Africa/Europe | International Development Policy |
| Competing interests, clashing ideas and institutionalizing influence: insights into the political economy of malaria control from seven African countries               | Democratic Republic of Congo (DRC), Ghana, Kenya, Malawi, Mali, Sierra Leone, Uganda | Original research | Justin Parkhurst             | 2021 | Malaria control | Agenda setting and formulation | 3Is                                                        | Single   | United Kingdom | Europe        | Health Policy and Planning       |
| Adopting localised health financing models for universal health coverage in Low and middle-income countries: lessons from the National Health Insurance Scheme in Ghana | Ghana                                                                                | Review            | Maximillian Kolbe Domapielle | 2021 | Financing-NHI   | Agenda setting and formulation | Integrative review of empirical and theoretical literature | Combined | Ghana          | Africa        | Heliyon                          |

|                                                                                                                                                                                           |                    |                   |                                       |      |                                  |                                       |                                     |          |        |        |                                              |
|-------------------------------------------------------------------------------------------------------------------------------------------------------------------------------------------|--------------------|-------------------|---------------------------------------|------|----------------------------------|---------------------------------------|-------------------------------------|----------|--------|--------|----------------------------------------------|
| Health Coverage and Financial Protection in Uganda: A Political Economy Perspective                                                                                                       | Uganda             | Review            | Maria Nannini                         | 2021 | Financing - Financial protection | Agenda setting and formulation        | Politics, policy, coverage outcomes | Single   | Italy  | Europe | International Journal of Health Policy & Mgt |
| "The Actor Is Policy": Application of Elite Theory to Explore Actors' Interests and Power Underlying Maternal Health Policies in Uganda, 2000-2015                                        | Uganda             | Original research | Moses Mukuru                          | 2021 | Maternal Health                  | Agenda setting and formulation        | Elite theory                        | Single   | Uganda | Africa | International Journal of Health Policy & Mgt |
| A Narrative Synthesis Review of Out-of-Pocket Payments for Health Services Under Insurance Regimes: A Policy Implementation Gap Hindering Universal Health Coverage in Sub-Saharan Africa | Multiple countries | Review            | Abigail Nyarko Codjoe Derkyi-Kwarteng | 2021 | Financing - User fees & NHI      | Implementation-service delivery level | Street level bureaucracy and others | Combined | Ghana  | Africa | International Journal of Health Policy & Mgt |

|                                                                                                                                             |                    |                   |                  |      |                           |                                |                              |        |         |        |                                            |
|---------------------------------------------------------------------------------------------------------------------------------------------|--------------------|-------------------|------------------|------|---------------------------|--------------------------------|------------------------------|--------|---------|--------|--------------------------------------------|
| The political economy of health financing reforms in Zimbabwe: a scoping review                                                             | Zimbabwe           | Review            | Mhazo TA         | 2021 | Financing-General         | Agenda setting and formulation | 3Is                          | Single | Malawi  | Africa | International Journal for equity in health |
| Agenda setting for essential medicines policy in sub-Saharan Africa: a retrospective policy analysis using Kingdon's multiple streams model | Multiple countries | Review            | Mhazo TA         | 2021 | Pharmaceutical policy     | Agenda setting and formulation | Kingdon                      | Single | Malawi  | Africa | Health systems and policy research         |
| Antimicrobial resistance national level dialogue and action in Ghana: setting and sustaining the agenda and outcomes                        | Ghana              | Original research | Augustina Koduah | 2021 | AMR                       | Agenda setting and formulation | Kingdon                      | single | Ghana   | Africa | One Health Outlook                         |
| Exploring mechanisms that explain how coalition groups are formed and how they work to sustain political                                    | Nigeria            | Original research | Chinyere Okeke   | 2021 | Maternal and child health | Agenda setting and formulation | Advocacy coalition framework | Single | Nigeria | Africa | Health Research Policy and System          |

|                                                                                                                                                  |        |                   |                          |      |                  |                                       |                      |        |        |        |                            |
|--------------------------------------------------------------------------------------------------------------------------------------------------|--------|-------------------|--------------------------|------|------------------|---------------------------------------|----------------------|--------|--------|--------|----------------------------|
| priority for maternal and child health in Nigeria using the advocacy coalition framework                                                         |        |                   |                          |      |                  |                                       |                      |        |        |        |                            |
| Why did Ghana's national health insurance capitation payment model fall off the policy agenda? A regional level policy analysis                  | Ghana  | Original research | Gilbert Abotisem Abihiro | 2021 | Financing-NHI    | Agenda setting and formulation        | Shiffman and Smith   | Single | Ghana  | Africa | Health Policy and Planning |
| Does decentralization of health systems translate into decentralization of authority? A decision space analysis of Ugandan healthcare facilities | Uganda | Original research | John Chen                | 2021 | Decentralization | Implementation-service delivery level | Decision space       | Single | Uganda | Africa | Health Policy and Planning |
| Examining health sector stakeholder perceptions on the efficiency of county health                                                               | Kenya  | Original research | Nyawira                  | 2021 | Priority setting | Agenda setting and formulation        | Stakeholder analysis | single | Kenya  | Africa | PLOS Global Public Health  |

|                                                                                                                                      |              |                   |                  |      |                           |                                       |                                                        |          |              |        |                              |
|--------------------------------------------------------------------------------------------------------------------------------------|--------------|-------------------|------------------|------|---------------------------|---------------------------------------|--------------------------------------------------------|----------|--------------|--------|------------------------------|
| systems in Kenya                                                                                                                     |              |                   |                  |      |                           |                                       |                                                        |          |              |        |                              |
| An Analysis of the Adoption and Implementation of A Sugar-Sweetened Beverage Tax in South Africa: A Multiple Streams Approach        | South Africa | Original research | Petronell Kruger | 2021 | CDOH                      | Agenda setting and formulation        | Kingdon                                                | Single   | South Africa | Africa | Health Systems and Reform    |
| Expressions of actor power in implementation: a qualitative case study of a health service intervention in South Africa              | South Africa | Original research | Helen Schneider  | 2022 | Maternal and child health | Implementation-service delivery level | Veneklasen and Miller's typology of the forms of power | Combined | South Africa | Africa | BMC Health Services Research |
| The importance of prioritizing politics in Good Governance for Medicines Initiative in Zimbabwe: a qualitative policy analysis study | Zimbabwe     | Original research | Mhazo TA         | 2022 | Pharmaceutical policy     | Agenda setting and formulation        | Shiffman & Smith                                       | Single   | Malawi-      | Africa | Health Policy and Planning   |

|                                                                                                                                                                                      |              |                   |                |      |          |                                |                    |          |              |        |                          |
|--------------------------------------------------------------------------------------------------------------------------------------------------------------------------------------|--------------|-------------------|----------------|------|----------|--------------------------------|--------------------|----------|--------------|--------|--------------------------|
| Asserting public health interest in acting on commercial determinants of health in sub-Saharan Africa: insights from a discourse analysis                                            | SSA          | Original research | Rene Loewenson | 2022 | CDOH     | Agenda setting and formulation | Discourse analysis | Single   | Zimbabwe     | Africa | BMJ Global Health        |
| Politicising 'COVID-19': an analysis of selected ZANU-PF officials' 2020-2021 media statements on the pandemic in Zimbabwe                                                           | Zimbabwe     | Review            | Mutekwe        | 2022 | COVID-19 | Agenda setting and formulation | Biopower           | single   | South Africa | Africa | Acta Academica           |
| Does international trade and investment liberalization facilitate corporate power in nutrition and alcohol policymaking? Applying an integrated political economy and power analysis | South Africa | Original research | Milsom et al.  | 2022 | CDOH     | Agenda setting and formulation | PEA/Power          | Combined | South Africa | Africa | Globalization and Health |

|                                                                                                             |             |                   |                |      |                |                                |                      |          |             |        |                                            |
|-------------------------------------------------------------------------------------------------------------|-------------|-------------------|----------------|------|----------------|--------------------------------|----------------------|----------|-------------|--------|--------------------------------------------|
| approach to a case study of South Africa                                                                    |             |                   |                |      |                |                                |                      |          |             |        |                                            |
| The political economy of priority-setting for health in South Sudan: a case study of the Health Pooled Fund | South Sudan | Original research | Heloise Widdig | 2022 | Pooled funding | Agenda setting and formulation | Walt and Gilson, 3Is | Combined | Netherlands | Europe | International Journal for Equity in Health |
